# Supplementary material for: Hydrogen absorption–desorption characteristics of a Gd2Co7-type Sm1.6Mg0.4Ni7 compound
Source: Royal Society of Chemistry journal article supplement (doi:10.1039/c6ta02889f), 2016-01-01
Supplement: c6ta02889f1.pdf [file c6ta02889f1.pdf]

## Supplementary Information

### Hydrogen absorption–desorption characteristics of a $\text{Gd}_2\text{Co}_7$ -type $\text{Sm}_{1.6}\text{Mg}_{0.4}\text{Ni}_7$ compound

Lu Zhang,<sup>ab</sup> Yanqiao Ding,<sup>ab</sup> Yuan Li,<sup>ab</sup> Yumeng Zhao,<sup>ab</sup> Xin Zhao,<sup>c</sup> Baozhong Liu<sup>\*d</sup> and Shumin Han<sup>\*a,b</sup>

<sup>a</sup> State Key Laboratory of Metastable Materials Science and Technology, Yanshan University, Qinhuangdao 066004, PR China

<sup>b</sup> College of Environmental and Chemical Engineering, Yanshan University, Qinhuangdao 066004, PR China

<sup>c</sup> Baotou Research Institute of Rare Earth, Baotou 014030, PR China

<sup>d</sup> School of Materials Science & Engineering, Henan Polytechnic University, Jiaozuo 454000, PR China

---

\* Corresponding author:

Tel./fax: +86-335-8074648, E-mail address: [hanshm@ysu.edu.cn](mailto:hanshm@ysu.edu.cn) (S. Han)

Tel./fax: +86 335 3989859, E-mail address: [bzliu@hpu.edu.cn](mailto:bzliu@hpu.edu.cn) (B. Liu)

❖ Hydrogen desorption kinetic curves

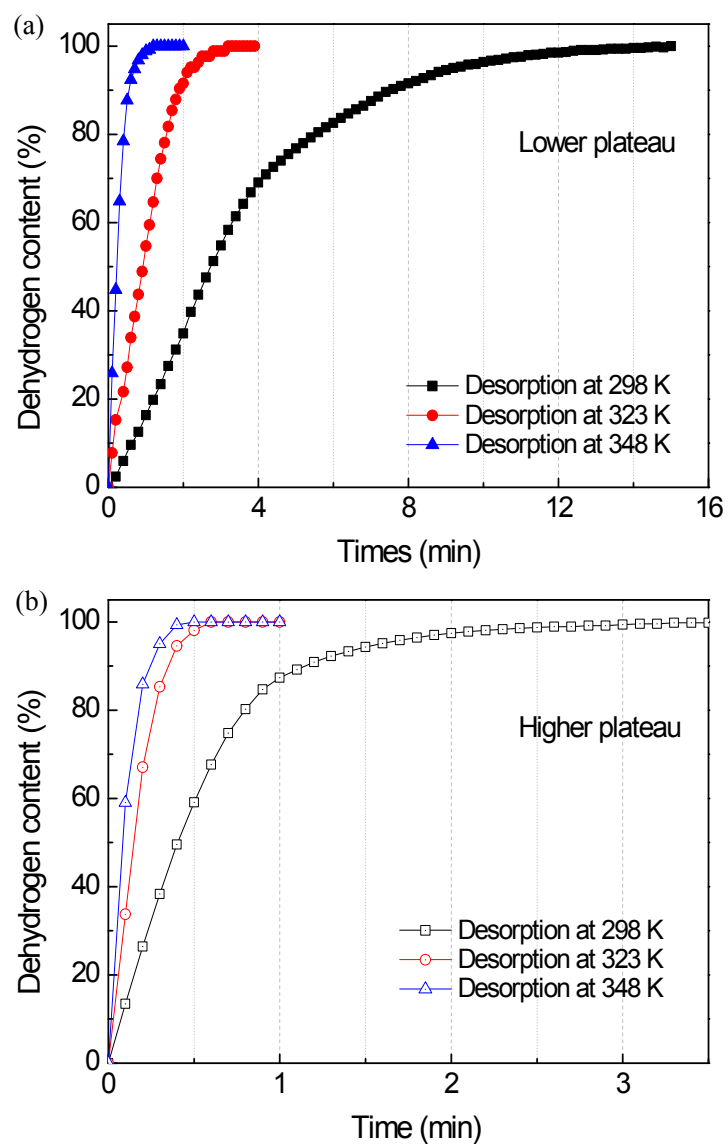

Fig. S1 Hydrogen desorption kinetic curves for the  $\text{Sm}_{1.6}\text{Mg}_{0.4}\text{Ni}_7$  compound across the lower and higher plateaus measured in the range of 298–348 K.

❖ Rietveld refinements of the  $\text{Sm}_{1.6}\text{Mg}_{0.4}\text{Ni}_7$  compound during hydrogenated process

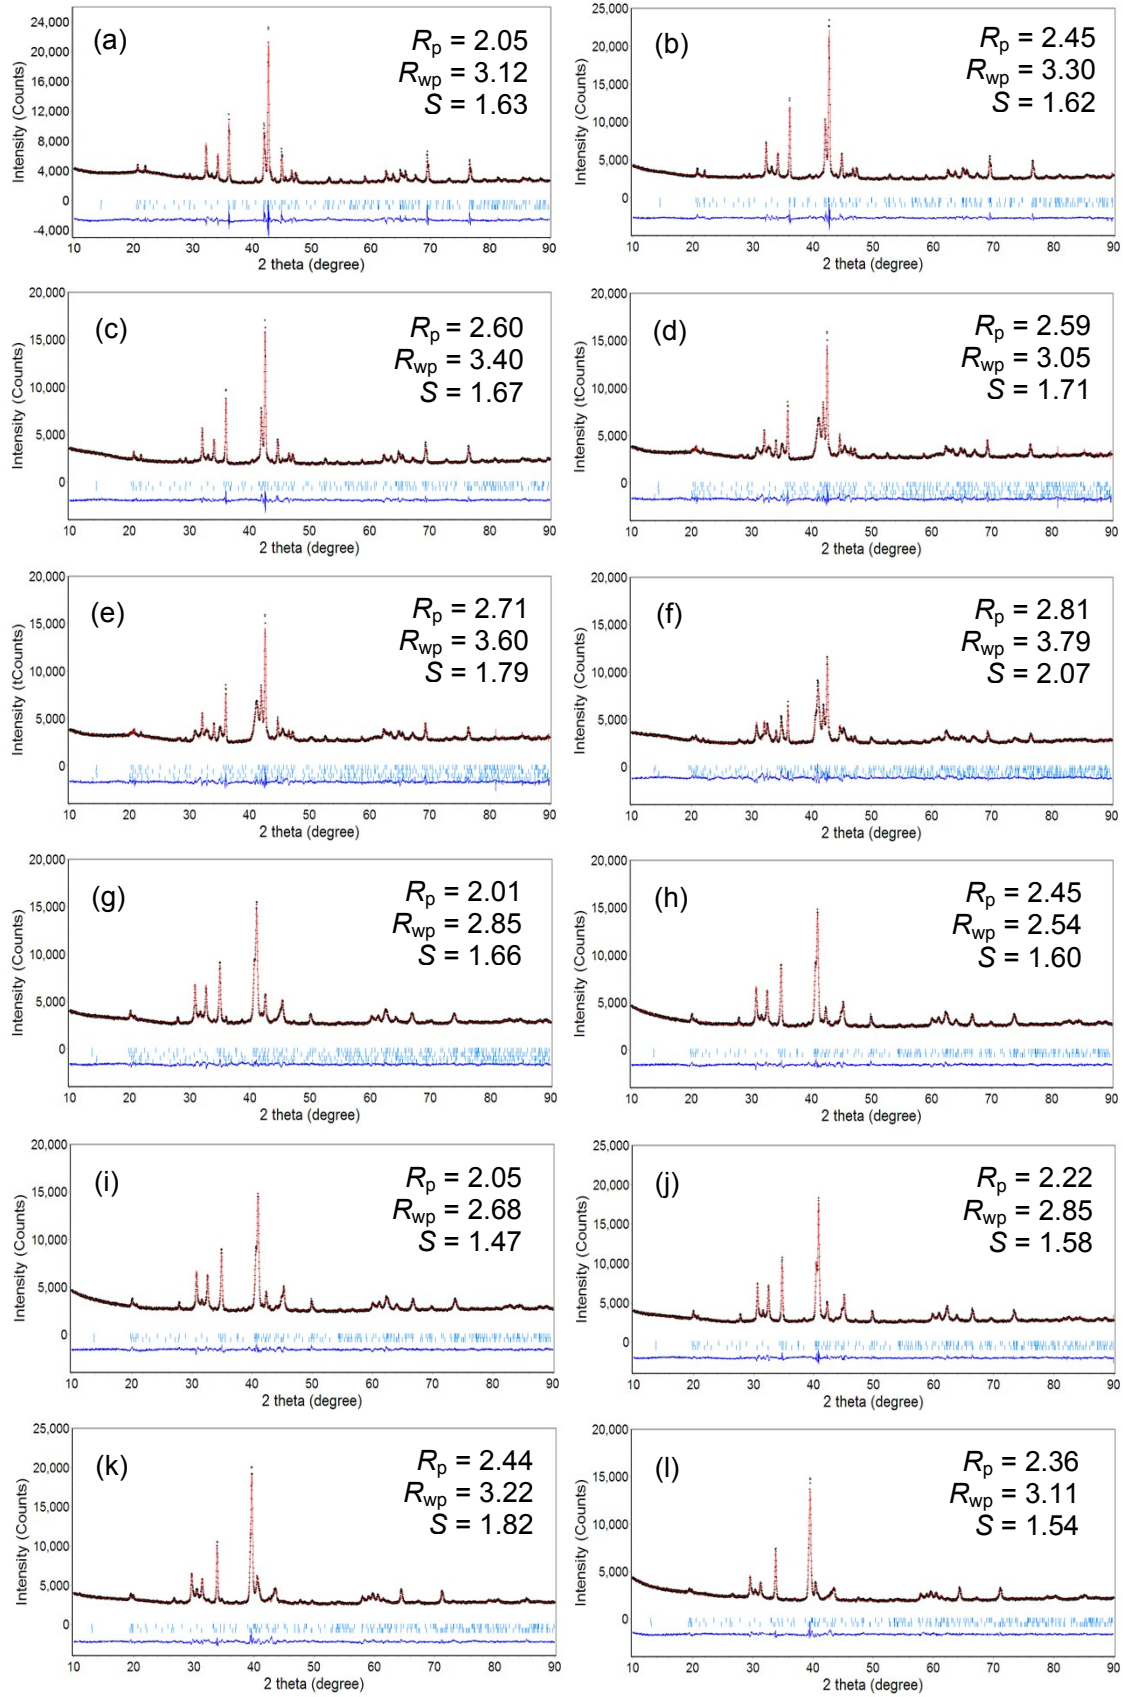

Fig. S2 Rietveld refinements of the  $\text{Sm}_{1.6}\text{Mg}_{0.4}\text{Ni}_7$  compound during hydrogenated process: (a) Original, (b) 0.06 wt.%, (c) 0.10 wt.%, (d) 0.31 wt.%, (e) 0.41 wt.%, (f) 0.52 wt.%, (g) 0.71 wt.%, (h) 0.82 wt.%, (i) 0.92 wt.%, (j) 1.34 wt.%, (k) 1.70 wt.% and (h) 1.88 wt.%. Vertical bars below the patterns show the positions of all possible reflection peaks of the  $\text{Ce}_2\text{Ni}_7$ -type (2H) and  $\text{Gd}_2\text{Co}_7$ -type (3R) solid solution (SS) phases for (a–c); 2H-SS, 3R-SS, 2H-hydride (H) and 3R-H phases for (d–g); and 2H-H and 3R-H phases for (h–l).

# Rietveld refinements of the $\text{Sm}_{1.6}\text{Mg}_{0.4}\text{Ni}_7$ compound during dehydrogenated process

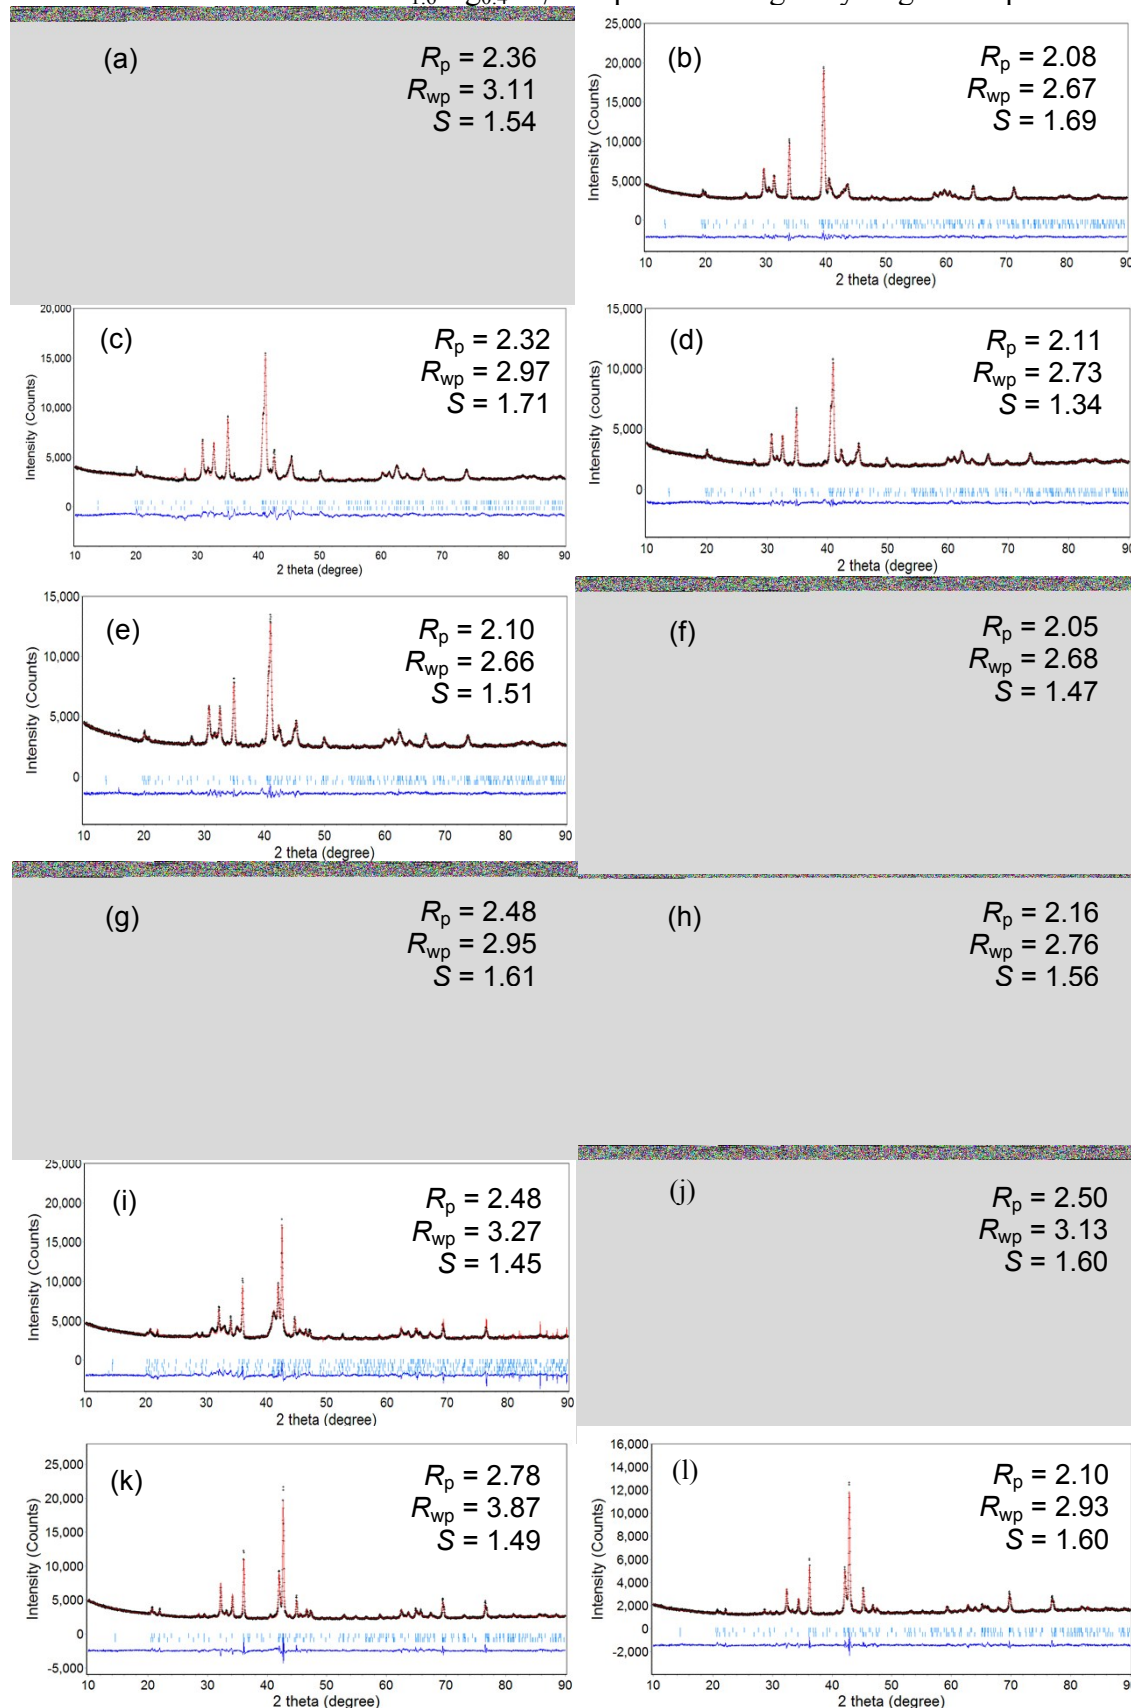

Fig. S3 Rietveld refinements of the  $\text{Sm}_{1.6}\text{Mg}_{0.4}\text{Ni}_7$  compound during dehydrogenated process: (a) 1.88 wt.%, (b) 1.62 wt.%, (c) 1.45 wt.%, (d) 1.15 wt.%, (e) 1.03 wt.%, (f) 0.92 wt.%, (g) 0.68 wt.%, (h) 0.60 wt.%, (i) 0.48 wt.%, (j) 0.21 wt.%, (k) 0.15 wt.% and (l) Original. Vertical bars below the patterns show the positions of all possible reflection peaks of the 2H-H and 3R-H phases for (a–f); 2H-H, 3R-H and 2H-SS, 3R-SS phases for (g–i); and 2H-SS and 3R-SS phases for (j–l).
